# Supplementary figures and images for: Node of Ranvier length as a potential regulator of myelinated axon conduction speed
Source: eLife journal article supplement (doi:10.7554/elife.23329), 2017-01-28

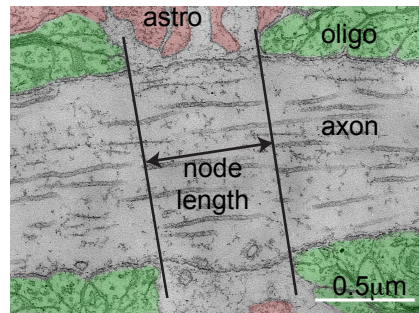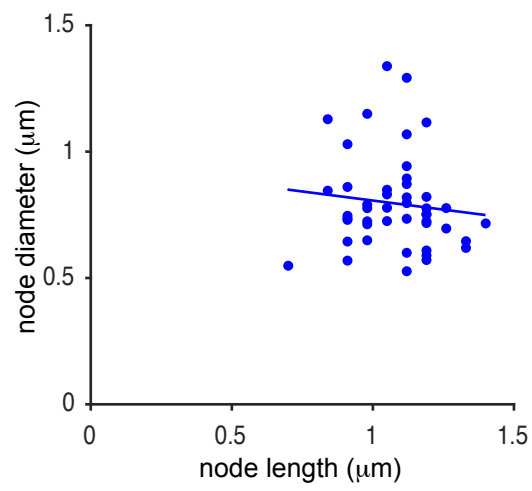

Figure 1- figure supplement 1

Supplement: supp [file elife_poa_e23329_Figure_1_Figure_Supplement_1.pdf › elife_poa_e23329_Figure_1_Figure_Supplement_1.pdf]
